# Supplementary material for: Role of Diagnostics in Epidemiology, Management, Surveillance, and Control of Leptospirosis
Source: MDPI journal article supplement (doi:10.3390/pathogens11040395), 2022-03-24
Supplement: s1 [file s1]

**Supplementary Information for: Role of diagnostics in epidemiology, management, surveillance, and control of leptospirosis**

**Authors:** Sykes, J.E.; Reagan, K.L.; Nally, J.E.; Galloway, R.L.; Haake, D.A.

**Journal:** *Pathogens* **2022**, *11*, 395. <https://doi.org/10.3390/pathogens11040395>

**Supplemental Table S1. MAT Panel Serovars**

| <u>Centers for Disease Control and Prevention</u>                                                                                                                                                                                                                                                                                                                                                                                                                                                                                                                                                                                                                                                                                                                                                                                                                                                                                                                                                                                                                                                                                                                                                                                                                                                                  | <u>California Animal Health and Food Safety Laboratory at the University of California-Davis</u>                                                                                                                                                                                                                                                                                                                         | <u>National Veterinary Services Laboratories</u>                                                                                                                                                                                                                                                                                                                                                                                                                                                                                                                                                                                                                                                                                                                                                                                                                                                                                                                                                                                    |
|--------------------------------------------------------------------------------------------------------------------------------------------------------------------------------------------------------------------------------------------------------------------------------------------------------------------------------------------------------------------------------------------------------------------------------------------------------------------------------------------------------------------------------------------------------------------------------------------------------------------------------------------------------------------------------------------------------------------------------------------------------------------------------------------------------------------------------------------------------------------------------------------------------------------------------------------------------------------------------------------------------------------------------------------------------------------------------------------------------------------------------------------------------------------------------------------------------------------------------------------------------------------------------------------------------------------|--------------------------------------------------------------------------------------------------------------------------------------------------------------------------------------------------------------------------------------------------------------------------------------------------------------------------------------------------------------------------------------------------------------------------|-------------------------------------------------------------------------------------------------------------------------------------------------------------------------------------------------------------------------------------------------------------------------------------------------------------------------------------------------------------------------------------------------------------------------------------------------------------------------------------------------------------------------------------------------------------------------------------------------------------------------------------------------------------------------------------------------------------------------------------------------------------------------------------------------------------------------------------------------------------------------------------------------------------------------------------------------------------------------------------------------------------------------------------|
| Serum source: Humans                                                                                                                                                                                                                                                                                                                                                                                                                                                                                                                                                                                                                                                                                                                                                                                                                                                                                                                                                                                                                                                                                                                                                                                                                                                                                               | Serum source: Companion Animals                                                                                                                                                                                                                                                                                                                                                                                          | Serum source: Agricultural Animals                                                                                                                                                                                                                                                                                                                                                                                                                                                                                                                                                                                                                                                                                                                                                                                                                                                                                                                                                                                                  |
| Serovars:                                                                                                                                                                                                                                                                                                                                                                                                                                                                                                                                                                                                                                                                                                                                                                                                                                                                                                                                                                                                                                                                                                                                                                                                                                                                                                          | Serovars:                                                                                                                                                                                                                                                                                                                                                                                                                | Serovars:                                                                                                                                                                                                                                                                                                                                                                                                                                                                                                                                                                                                                                                                                                                                                                                                                                                                                                                                                                                                                           |
| <i>L. interrogans</i> serogroup Australis serovar Australis<br><i>L. interrogans</i> serogroup Australis serovar Bratislava<br><i>L. interrogans</i> serogroup Autumnalis serovar Autumnalis<br><i>L. borgpetersenii</i> serogroup Ballum serovar Ballum<br><i>L. interrogans</i> serogroup Bataviae serovar Bataviae<br><i>L. interrogans</i> serogroup Canicola serovar Canicola<br><i>L. weilii</i> serogroup Celledoni serovar Celledoni<br><i>L. kirschneri</i> serogroup Cynopteri serovar Cynopteri<br><i>L. interrogans</i> serogroup Djasiman serovar Djasiman<br><i>L. kirschneri</i> serogroup Grippotyphosa serovar Grippotyphosa<br><i>L. santarosai</i> serogroup Hebdomadis serovar Borincana<br><i>L. interrogans</i> serogroup Icterohaemorrhagiae serovar Icterohaemorrhagiae<br><i>L. interrogans</i> serogroup Icterohaemorrhagiae serovar Mankarso<br><i>L. borgpetersenii</i> serogroup Javanica serovar Javanica<br><i>L. santarosai</i> serogroup Mini serovar Georgia LT 117<br><i>L. interrogans</i> serogroup Pomona serovar Pomona<br><i>L. interrogans</i> serogroup Pyrogenes serovar Pyrogenes<br><i>L. santarosai</i> serogroup Pyrogenes serovar Alexi<br><i>L. interrogans</i> serogroup Sejroe serovar Wolffi<br><i>L. borgpetersenii</i> serogroup Tarassovi serovar Tarassovi | <i>L. interrogans</i> serogroup Icterohaemorrhagiae serovar Icterohaemorrhagiae<br><br><i>L. interrogans</i> serogroup Canicola serovar Canicola<br><br><i>L. interrogans</i> serogroup Australis serovar Bratislava<br><br><i>L. interrogans</i> serogroup Pomona serovar Pomona<br><br><i>L. kirschneri</i> Serogroup Grippotyphosa serovar Grippotyphosa<br><br><i>L. interrogans</i> Serogroup Sejroe serovar Hardjo | <br><br><u>Limited panel:</u><br><i>L. interrogans</i> sg Australis sv Bratislava<br><i>L. interrogans</i> sg Canicola sv Canicola<br><i>L. interrogans</i> sg Grippotyphosa sv Grippotyphosa<br><i>L. interrogans</i> sg Icterohaemorrhagiae sv Copenhageni<br><i>L. interrogans</i> sg Pomona sv Pomona<br><i>L. interrogans</i> sg Sejroe sv Hardjo<br><br><u>Extended panel also includes:</u><br><i>L. interrogans</i> sg Australis sv Australis<br><i>L. interrogans</i> sg Autumnalis sv Autumnalis<br><i>L. borgpetersenii</i> sg Ballum sv Ballum<br><i>L. interrogans</i> sg Bataviae sv Bataviae<br><i>L. kirschneri</i> sg Cynopteri sv Cynopteri<br><i>L. interrogans</i> sg Djasiman sv Djasiman<br><i>L. interrogans</i> sg Hebdomadis sv Hebdomadis<br><i>L. interrogans</i> sg Mini sv Szwajizak<br><i>L. interrogans</i> sg Pyrogenes sv Pyrogenes<br><i>L. borgpetersenii</i> sg Sejroe sv Sejroe<br><i>L. borgpetersenii</i> sg Tarassovi sv Tarassovi<br><i>L. tipperaryensis</i> sg Not Designated sv Room 22 |

**Supplemental Table S2: Modified Faine's criteria (2012)\***

| Part A: Clinical data                          | <u>Score</u> |
|------------------------------------------------|--------------|
| Headache                                       | 2            |
| Fever                                          | 2            |
| Temperature > 39°C                             | 2            |
| Conjunctival suffusion                         | 4            |
| Meningismus                                    | 4            |
| Myalgia                                        | 4            |
| Conjunctival suffusion + Meningismus + Myalgia | 10           |
| Jaundice                                       | 1            |
| Albuminuria/Nitrogen retention                 | 2            |
| Hemoptysis/Dyspnea                             | 2            |
| Part B: Epidemiologic factors                  |              |
| Rainfall                                       | 5            |
| Contact with contaminated environment          | 4            |
| Animal contact                                 | 1            |
| Part C: Bacteriologic and laboratory findings  |              |
| Positive Culture and/or PCR                    | 25           |
| Serology                                       |              |
| One or more of the following:                  | 15           |
| IgM-ELISA                                      |              |
| Slide agglutination test                       |              |
| Other serologic test                           |              |
| MAT – single positive titer $\geq 400$         |              |
| MAT – paired sera with four-fold rise in titer | 25           |
| Diagnosis                                      |              |
| Confirmed: Positive Culture and/or PCR         |              |
| Presumptive                                    |              |
| Total of Parts A and B                         | $\geq 26$    |
| Total of Parts A, B, and C                     | $\geq 25$    |
| Possible                                       | 20-24        |

\*Adapted from reference [1].

### **Supplemental Table S3: Human Leptospirosis Case Definitions\***

**Suspect Case:** Acute febrile illness ( $\geq 38.5^{\circ}\text{C}$ ) and/or severe headache with:

- Myalgia
- Prostration and/or conjunctival suffusion, and
- History of exposure

**Probable Case** (clinical definition): Suspect case w/any **two** of the following:

- Calf tenderness
- Cough with or without hemoptysis
- Jaundice
- Hemorrhagic manifestations
- Meningeal irritation
- Anuria/oliguria and/or proteinuria
- Shortness of breath
- Cardiac arrhythmias
- Skin rash
- Abortion

**Probable Case** (laboratory definition): Suspect case with + rapid IgM test and/or any 3 of the following:

- Urinary findings: proteinuria, white blood cells, red blood cells
- Relative neutrophilia ( $>80\%$ ) with lymphopenia
- Platelets  $<100,000/\text{mm}^3$
- Elevated serum bilirubin ( $>2\text{mg}\%$ ); liver enzymes moderately raised

**Confirmed Case:** Suspect or probable case with any one of the following:

- Isolation of leptospires from clinical specimens
- Positive PCR result
- Seroconversion from negative to positive or 4-fold rise in MAT titer
- MAT titer  $\geq 400$  in a single sample

\*Adapted from reference [2].

#### References

1. Kumar, S.S. Indian guidelines for the diagnosis and management of human leptospirosis. In *India: Medicine Update*; Muruganathan, A., Ed.; The Association of Physicians of India: Mumbai, India; 2013; pp. 23–29.
2. WHO. *Informal Expert Consultation on Surveillance, Diagnosis and Risk Reduction of Leptospirosis. Chennai, India, 17–18 September 2009*; SEA-CD-217; World Health Organization – Regional Office for South-East Asia: New Delhi, India. Available online: <https://tinyurl.com/4kdnnsz7> (accessed on 03/23/2022).
